# Supplementary material for: Cross-Protection Induced by a A/MAY/97 Emergency Vaccine Against Intra-Serotype Heterologous Challenge with a Foot-and-Mouth Disease Virus from the A/ASIA/G-VII Lineage
Source: PubMed Central journal article supplement (PMC7157754; doi:10.3390/vaccines8010024), 2020-01-14
Supplement: vaccines-08-00024-s001.pdf [file vaccines-08-00024-s001.pdf]

# Supplementary material

Supplementary Table 1a. VNT titres against A<sub>22</sub>/IRQ/64 vaccine strain in vaccinated and unvaccinated cattle in the full dose protection test (animal numbers in bold indicate cattle with clear or doubtful foot lesions).

| Groups                  | Animal      | Days post challenge |      |      |      |      |      |      |      |      |      |      |      |      |      |      |      |
|-------------------------|-------------|---------------------|------|------|------|------|------|------|------|------|------|------|------|------|------|------|------|
|                         |             | -21                 | -18  | -14  | -11  | -7   | -4   | 0    | 1    | 2    | 3    | 4    | 5    | 6    | 7    | 8    |      |
| A <sub>22</sub> /IRQ/64 | 1227        | <0.3                | <0.3 | 1.20 | 1.80 | 2.10 | 2.10 | 2.10 | 2.10 | 2.10 | 2.25 | 2.40 | 2.40 | >2.7 | >2.7 | >2.7 |      |
|                         | <b>1228</b> | <0.3                | <0.3 | 1.65 | 2.40 | 2.10 | 2.10 | 2.10 | 2.10 | 2.10 | 2.25 | 2.40 | 2.40 | >2.7 | >2.7 | >2.7 |      |
|                         | <b>1229</b> | <0.3                | <0.3 | 1.35 | 2.10 | 1.95 | 1.95 | 2.25 | 2.10 | 2.25 | 2.40 | 2.40 | 2.40 | >2.7 | >2.7 | >2.7 |      |
|                         | <b>1230</b> | <0.3                | <0.3 | 1.05 | 2.10 | 2.10 | 1.80 | 2.10 | 1.95 | 2.10 | 2.25 | 2.40 | 2.55 | >2.7 | >2.7 | >2.7 |      |
|                         | <b>1231</b> | <0.3                | <0.3 | 1.50 | 1.95 | 2.10 | 1.80 | 2.10 | 1.95 | 1.95 | 2.25 | 2.10 | 2.25 | >2.7 | >2.7 | >2.7 |      |
|                         | 1232        | <0.3                | <0.3 | 1.50 | 2.10 | 1.80 | 2.10 | 2.25 | 2.10 | 2.10 | 2.10 | 2.10 | 2.40 | >2.7 | >2.7 | >2.7 |      |
|                         | <b>1233</b> | <0.3                | <0.3 | 1.35 | 1.35 | 1.50 | 1.65 | 1.65 | 1.50 | 1.65 | 1.65 | 1.65 | 1.80 | 2.40 | >2.7 | >2.7 | >2.7 |
|                         | A/MAY/97    | <b>1234</b>         | <0.3 | <0.3 | <0.6 | <0.6 | <0.6 | 0.60 | 0.60 | 0.75 | 0.90 | 0.90 | 1.05 | 1.80 | 1.50 | 1.95 | 1.80 |
| 1235                    |             | <0.3                | <0.3 | 0.60 | 0.90 | 0.90 | 0.90 | 0.60 | 0.90 | 0.90 | 0.90 | 0.90 | 2.10 | 1.95 | 2.10 | 2.25 |      |
| 1236                    |             | 0.45                | <0.3 | <0.6 | 0.75 | <0.6 | <0.6 | <0.6 | <0.6 | <0.6 | <0.6 | <0.6 | 1.50 | 1.80 | 2.40 | 2.40 |      |
| <b>1237</b>             |             | <0.3                | <0.3 | <0.6 | 0.75 | <0.6 | <0.6 | 0.60 | 0.75 | 0.75 | 0.75 | 0.90 | 1.80 | 1.65 | 1.80 | 1.80 |      |
| 1238                    |             | 0.30                | <0.3 | <0.6 | 0.75 | 0.75 | 1.05 | 0.90 | 0.90 | 0.90 | 0.90 | 0.90 | 1.80 | 1.65 | 1.95 | 1.80 |      |
| 1239                    |             | <0.3                | <0.3 | 0.60 | 0.90 | 0.60 | 0.60 | 0.60 | 0.60 | 0.90 | 0.90 | 0.75 | 1.50 | 1.65 | 1.80 | 2.10 |      |
| 1240                    |             | <0.3                | <0.3 | <0.6 | 0.60 | 0.60 | 0.60 | 0.90 | 0.90 | 0.90 | 1.20 | 0.90 | 1.50 | 1.80 | 1.95 | 1.80 |      |
| Unvaccinated Controls   |             | <b>1241</b>         |      |      |      |      |      | <0.6 | <0.6 | 0.60 | <0.6 | <0.6 | 1.80 | 1.65 | 1.65 | 1.50 |      |
|                         | <b>1242</b> |                     |      |      |      |      | <0.6 | <0.6 | <0.6 | <0.6 | <0.6 | 1.50 | 1.50 | 1.65 | 1.50 |      |      |
|                         | <b>1243</b> |                     |      |      |      |      | <0.6 | <0.6 | 0.60 | <0.6 | <0.6 | 1.50 | 1.65 | 1.50 | 1.50 |      |      |

Supplementary Table 1b. VNT titres against A/MAY/97 vaccine strain in vaccinated and unvaccinated cattle in the full dose protection test

| Groups                   | Animal      | Days post challenge |      |      |      |      |      |      |      |      |      |      |      |      |      |      |  |
|--------------------------|-------------|---------------------|------|------|------|------|------|------|------|------|------|------|------|------|------|------|--|
|                          |             | -21                 | -18  | -14  | -11  | -7   | -4   | 0    | 1    | 2    | 3    | 4    | 5    | 6    | 7    | 8    |  |
| A <sub>22</sub> /IRQ/64  | 1227        | <0.3                | <0.3 | 0.60 | 0.75 | 0.60 | 1.20 | 0.75 | 0.90 | 1.20 | 1.05 | 1.20 | 2.25 | 2.70 | >2.7 | >2.7 |  |
|                          | <b>1228</b> | <0.3                | <0.3 | 1.05 | 1.35 | 1.20 | 0.75 | 0.90 | 0.75 | 1.20 | 1.20 | 1.20 | 2.40 | >2.7 | >2.7 | >2.7 |  |
|                          | <b>1229</b> | 0.30                | <0.3 | <0.6 | 1.50 | 1.20 | 1.35 | 1.35 | 1.20 | 1.20 | 1.35 | 1.20 | 2.55 | 2.55 | >2.7 | >2.7 |  |
|                          | <b>1230</b> | 0.30                | <0.3 | 0.60 | 1.05 | 0.75 | 0.90 | 0.60 | 0.60 | 0.60 | 1.05 | 1.35 | 2.55 | >2.7 | >2.7 | >2.7 |  |
|                          | <b>1231</b> | <0.3                | <0.3 | 0.60 | 1.80 | 1.50 | 1.20 | 1.05 | 0.90 | 1.05 | 1.20 | 1.05 | 1.65 | 2.70 | >2.7 | >2.7 |  |
|                          | 1232        | <0.3                | <0.3 | 0.90 | 1.05 | 1.20 | 1.20 | 0.75 | 0.90 | 1.05 | 1.05 | 1.20 | 1.65 | 2.70 | 2.70 | >2.7 |  |
|                          | <b>1233</b> | <0.3                | <0.3 | 0.60 | 1.05 | 0.75 | 0.90 | <0.6 | 0.60 | 0.60 | <0.6 | 0.75 | 1.80 | 2.70 | 2.70 | >2.7 |  |
|                          | <b>1234</b> | <0.3                | <0.3 | 1.80 | 1.80 | 1.80 | 1.80 | 2.10 | 1.80 | 2.25 | 1.95 | 2.40 | 2.55 | >2.7 | 2.70 | >2.7 |  |
| A/MAY/97                 | 1235        | <0.3                | <0.3 | 1.80 | 2.25 | 2.25 | 2.40 | 2.40 | 2.40 | 2.40 | 2.55 | 2.55 | 2.70 | >2.7 | >2.7 | >2.7 |  |
|                          | 1236        | 0.30                | <0.3 | 1.05 | 1.50 | 1.65 | 1.65 | 1.80 | 1.80 | 1.80 | 1.80 | 1.80 | 2.40 | >2.7 | >2.7 | >2.7 |  |
|                          | <b>1237</b> | <0.3                | <0.3 | 1.05 | 1.65 | 1.50 | 1.50 | 2.10 | 2.10 | 2.40 | 2.40 | 2.40 | 2.70 | >2.7 | 2.70 | >2.7 |  |
|                          | 1238        | 0.30                | <0.3 | 1.20 | 2.10 | 2.10 | 1.95 | 2.40 | 2.25 | 2.40 | 2.40 | 2.55 | 2.70 | >2.7 | >2.7 | >2.7 |  |
|                          | 1239        | <0.3                | <0.3 | 1.20 | 1.65 | 1.80 | 1.80 | 1.95 | 1.80 | 2.40 | 2.55 | 2.40 | 2.70 | 2.70 | 2.70 | >2.7 |  |
|                          | 1240        | <0.3                | <0.3 | 1.20 | 1.80 | 2.10 | 1.95 | 1.95 | 1.95 | 2.25 | 2.40 | 2.55 | >2.7 | 2.70 | >2.7 | >2.7 |  |
|                          | <b>1241</b> |                     |      |      |      |      |      | <0.6 | <0.6 | 0.90 | 0.60 | 0.75 | 1.50 | 1.80 | 1.80 | 1.95 |  |
| Unvaccinated<br>Controls | <b>1242</b> |                     |      |      |      |      |      | <0.6 | <0.6 | 0.60 | 0.75 | 0.60 | 1.20 | 1.80 | 1.50 | 2.10 |  |
|                          | <b>1243</b> |                     |      |      |      |      |      | <0.6 | <0.6 | 0.90 | 0.75 | 0.60 | 1.20 | 1.50 | 1.65 | 1.80 |  |

Supplementary Table 1c. VNT titres against A/IRN/22/2015 challenge strain in vaccinated and unvaccinated cattle in the full dose protection test (animal numbers in bold indicate cattle with clear or doubtful foot lesions).

| Groups                   | Animal      | Days post challenge |      |      |      |      |      |      |      |      |      |      |      |      |      |      |
|--------------------------|-------------|---------------------|------|------|------|------|------|------|------|------|------|------|------|------|------|------|
|                          |             | -21                 | -18  | -14  | -11  | -7   | -4   | 0    | 1    | 2    | 3    | 4    | 5    | 6    | 7    | 8    |
| A <sub>22</sub> /IRQ/64  | 1227        | 0.75                | <0.3 | 1.35 | 1.95 | 1.95 | 1.80 | 1.20 | 1.50 | 1.65 | 2.10 | 1.95 | 2.70 | >2.7 | >2.7 | >2.7 |
|                          | <b>1228</b> | <0.3                | <0.3 | 1.65 | 2.25 | 1.95 | 1.80 | 1.05 | 1.50 | 1.65 | 1.65 | 2.10 | 2.70 | >2.7 | >2.7 | >2.7 |
|                          | <b>1229</b> | 0.75                | <0.3 | 1.35 | 1.95 | 1.65 | 1.50 | 1.50 | 1.65 | 1.50 | 1.95 | 2.10 | 2.70 | >2.7 | >2.7 | >2.7 |
|                          | <b>1230</b> | 0.90                | <0.3 | 1.20 | 2.10 | 1.95 | 1.65 | 1.50 | 1.35 | 1.50 | 1.50 | 2.10 | 2.70 | >2.7 | >2.7 | >2.7 |
|                          | <b>1231</b> | <0.3                | <0.3 | 1.80 | 2.40 | 1.95 | 1.95 | 1.05 | 1.50 | 1.35 | 1.50 | 1.65 | 2.10 | >2.7 | >2.7 | >2.7 |
|                          | 1232        | <0.3                | <0.3 | 1.50 | 2.10 | 2.10 | 1.80 | 1.20 | 1.65 | 1.65 | 1.95 | 2.25 | 2.70 | >2.7 | >2.7 | >2.7 |
|                          | <b>1233</b> | <0.3                | <0.3 | 1.20 | 1.65 | 1.50 | 1.20 | 0.60 | 0.90 | 1.05 | 1.35 | 1.80 | 2.70 | >2.7 | >2.7 | >2.7 |
| A/MAY/97                 | <b>1234</b> | <0.3                | 0.90 | 2.40 | 2.10 | 1.95 | 1.80 | 1.95 | 2.25 | 2.40 | 2.55 | 2.70 | 2.55 | >2.7 | >2.7 | >2.7 |
|                          | 1235        | <0.3                | <0.3 | 1.80 | 2.70 | 2.40 | 2.10 | 1.95 | 2.40 | 2.10 | 2.25 | 2.40 | 2.70 | >2.7 | >2.7 | >2.7 |
|                          | 1236        | 1.20                | <0.3 | 1.50 | 2.25 | 2.25 | 2.70 | 2.10 | 2.40 | 2.55 | 2.40 | 2.70 | 2.70 | >2.7 | >2.7 | >2.7 |
|                          | <b>1237</b> | <0.3                | <0.3 | 1.35 | 1.50 | 1.50 | 1.20 | 2.10 | 2.10 | 2.70 | 2.70 | 2.70 | 2.70 | >2.7 | >2.7 | >2.7 |
|                          | 1238        | 1.05                | <0.3 | 1.35 | 2.25 | 2.10 | 2.10 | 2.10 | 2.25 | 2.55 | 2.70 | 2.70 | 2.70 | >2.7 | >2.7 | >2.7 |
|                          | 1239        | 0.30                | 0.45 | 1.50 | 1.65 | 1.50 | 1.20 | 1.50 | 1.50 | 1.65 | 1.65 | 1.65 | 2.70 | >2.7 | >2.7 | >2.7 |
|                          | 1240        | <0.3                | <0.3 | 1.65 | 2.25 | 1.95 | 1.35 | 1.80 | 1.80 | 1.95 | 1.80 | 2.10 | 2.70 | >2.7 | >2.7 | >2.7 |
| Unvaccinated<br>Controls | <b>1241</b> |                     |      |      |      |      |      | <0.6 | <0.6 | 1.35 | 0.90 | 1.65 | 2.70 | >2.7 | >2.7 | >2.7 |
|                          | <b>1242</b> |                     |      |      |      |      |      | <0.6 | <0.6 | 0.75 | 0.75 | 1.20 | 2.25 | >2.7 | >2.7 | >2.7 |
|                          | <b>1243</b> |                     |      |      |      |      |      | <0.6 | <0.6 | 1.35 | 0.75 | 1.65 | 2.10 | >2.7 | >2.7 | >2.7 |

Supplementary Table 2. Results of virus isolation and titration (VI; log<sub>10</sub> PFU/ml) and viral RNA detected by real-time PCR (PCR; C<sub>p</sub> values) from serum of vaccinated and unvaccinated cattle in in the full dose protection test with A<sub>22</sub>/IRQ/64 and A/MAY/97 vaccines (animal numbers in bold indicate cattle with clear or doubtful foot lesions).

| Groups                  | Animal |     | 0 DPC | 1 DPC | 2 DPC | 3 DPC | 4 DPC | 5 DPC | 6 DPC | 7 DPC | 8 DPC |
|-------------------------|--------|-----|-------|-------|-------|-------|-------|-------|-------|-------|-------|
| A <sub>22</sub> /IRQ/64 | 1227   | PCR | -     | 33.08 | 31.67 | -     | -     | -     | -     | -     | -     |
|                         |        | VI  | -     | -     | -     | -     | -     | -     | -     | -     | -     |
|                         | 1228   | PCR | -     | 32.68 | 31.87 | 32.16 | -     | -     | -     | -     | -     |
|                         |        | VI  | -     | -     | -     | -     | -     | -     | -     | -     | -     |
|                         | 1229   | PCR | -     | -     | -     | 32.49 | 31.57 | -     | -     | -     | -     |
|                         |        | VI  | -     | -     | -     | -     | -     | -     | -     | -     | -     |
|                         | 1230   | PCR | -     | 32.73 | -     | -     | -     | -     | -     | -     | -     |
|                         |        | VI  | -     | -     | -     | -     | -     | -     | -     | -     | -     |
|                         | 1231   | PCR | -     | -     | 32.23 | -     | 31.77 | -     | -     | -     | -     |
|                         |        | VI  | -     | -     | -     | -     | -     | -     | -     | -     | -     |
|                         | 1232   | PCR | -     | 32.76 | 32.08 | -     | -     | -     | -     | -     | -     |
|                         |        | VI  | -     | -     | -     | -     | -     | -     | -     | -     | -     |
|                         | 1233   | PCR | -     | 31.50 | 31.98 | 31.11 | 31.68 | -     | -     | -     | -     |
|                         |        | VI  | -     | -     | -     | -     | -     | -     | -     | -     | -     |
| A/MAY/97                | 1234   | PCR | -     | -     | -     | -     | -     | -     | -     | -     | -     |
|                         |        | VI  | -     | -     | -     | -     | -     | -     | -     | -     | -     |
|                         | 1235   | PCR | -     | -     | -     | -     | -     | -     | -     | -     | -     |
|                         |        | VI  | -     | -     | -     | -     | -     | -     | -     | -     | -     |
|                         | 1236   | PCR | -     | -     | -     | -     | -     | -     | -     | -     | -     |
|                         |        | VI  | -     | -     | -     | -     | -     | -     | -     | -     | -     |
|                         | 1237   | PCR | -     | -     | 32.14 | -     | 31.78 | -     | -     | -     | -     |
|                         |        | VI  | -     | -     | -     | -     | -     | -     | -     | -     | -     |
|                         | 1238   | PCR | -     | -     | -     | -     | -     | -     | -     | -     | -     |
|                         |        | VI  | -     | -     | -     | -     | -     | -     | -     | -     | -     |
|                         | 1239   | PCR | -     | -     | -     | -     | -     | -     | -     | -     | -     |
|                         |        | VI  | -     | -     | -     | -     | -     | -     | -     | -     | -     |
|                         | 1240   | PCR | -     | -     | -     | -     | -     | -     | -     | -     | -     |
|                         |        | VI  | -     | -     | -     | -     | -     | -     | -     | -     | -     |
| Unvaccinated Controls   | 1241   | PCR | -     | 21.92 | 20.71 | 22.64 | 29.54 | 31.73 | -     | -     | -     |
|                         |        | VI  | -     | 3.33  | 3.31  | 2.74  | -     | -     | -     | -     | -     |
|                         | 1242   | PCR | -     | 24.21 | 18.95 | 19.38 | 24.66 | -     | -     | -     | -     |
|                         |        | VI  | -     | 2.60  | 3.41  | 3.03  | -     | -     | -     | -     | -     |
|                         | 1243   | PCR | -     | 20.01 | 19.50 | 20.90 | 29.88 | 31.80 | -     | -     | -     |
|                         |        | VI  | -     | 3.77  | 2.94  | 2.61  | -     | -     | -     | -     | -     |

Supplementary Table 3. Results of virus isolation and titration (VI; log<sub>10</sub> PFU/ml) and viral RNA detected by real-time PCR (PCR; C<sub>p</sub> values) from nose swabs of vaccinated and unvaccinated cattle in the full dose protection test with A<sub>22</sub>/IRQ/64 and A/MAY/97 vaccines (animal numbers in bold indicate cattle with clear or doubtful foot lesions).

| Groups                  | Animal |     | 0 DPC | 1 DPC | 2 DPC | 3 DPC | 4 DPC | 5 DPC | 6 DPC | 7 DPC | 8 DPC |
|-------------------------|--------|-----|-------|-------|-------|-------|-------|-------|-------|-------|-------|
| A <sub>22</sub> /IRQ/64 | 1227   | PCR | -     | -     | 28.84 | 27.66 | 32.13 | 31.94 | 31.69 | -     | -     |
|                         |        | VI  | -     | -     | -     | -     | -     | -     | -     | -     | -     |
|                         | 1228   | PCR | -     | 25.63 | 29.66 | 25.72 | 31.09 | 30.99 | 32.67 | 32.46 | 31.83 |
|                         |        | VI  | -     | 2.64  | 1.90  | -     | -     | -     | -     | -     | -     |
|                         | 1229   | PCR | -     | 31.97 | 24.93 | 30.46 | 31.63 | 31.74 | 31.67 | -     | 31.74 |
|                         |        | VI  | -     | -     | 2.14  | 1.18  | -     | -     | -     | -     | -     |
|                         | 1230   | PCR | -     | -     | 29.80 | 29.90 | 30.32 | 30.17 | 31.70 | 32.57 | 32.42 |
|                         |        | VI  | -     | -     | 1.24  | 0.70  | -     | -     | -     | -     | -     |
|                         | 1231   | PCR | -     | 31.71 | 21.57 | 28.16 | 26.91 | 29.27 | 29.91 | 28.23 | 31.48 |
|                         |        | VI  | -     | 1.00  | 3.25  | 2.18  | 2.49  | 1.00  | -     | -     | -     |
|                         | 1232   | PCR | -     | 32.25 | 29.46 | 29.90 | 28.29 | 30.56 | 31.83 | 33.43 | -     |
|                         |        | VI  | -     | -     | 0.88  | -     | 1.70  | -     | -     | -     | -     |
|                         | 1233   | PCR | -     | 31.92 | 29.11 | 26.99 | 23.43 | 18.87 | 30.73 | 18.70 | -     |
|                         |        | VI  | -     | 1.00  | 2.42  | -     | 2.61  | 1.88  | -     | -     | -     |
| A/MAY/97                | 1234   | PCR | -     | 31.99 | 28.05 | 31.25 | 29.23 | 29.76 | 31.82 | -     | -     |
|                         |        | VI  | -     | -     | 1.24  | -     | 1.10  | -     | -     | -     | -     |
|                         | 1235   | PCR | -     | 32.80 | 29.61 | 30.65 | 30.60 | 30.71 | 32.11 | -     | -     |
|                         |        | VI  | -     | -     | 1.44  | 1.35  | 0.40  | -     | -     | -     | -     |
|                         | 1236   | PCR | -     | 31.78 | 30.54 | 31.81 | 31.69 | 33.05 | 32.01 | -     | -     |
|                         |        | VI  | -     | -     | -     | -     | 0.40  | -     | -     | -     | -     |
|                         | 1237   | PCR | -     | 32.09 | 31.07 | 30.26 | 31.75 | 32.10 | 32.23 | 31.82 | -     |
|                         |        | VI  | -     | -     | 0.40  | -     | -     | -     | -     | -     | -     |
|                         | 1238   | PCR | -     | -     | 31.00 | -     | 32.14 | 32.20 | -     | -     | -     |
|                         |        | VI  | -     | -     | 0.40  | -     | -     | -     | -     | -     | -     |
|                         | 1239   | PCR | -     | -     | 31.32 | 31.59 | 30.00 | 31.75 | 31.71 | 28.56 | -     |
|                         |        | VI  | -     | -     | 0.70  | -     | 1.65  | -     | -     | -     | -     |
|                         | 1240   | PCR | -     | -     | 30.45 | 31.25 | 29.88 | 28.29 | 30.11 | -     | -     |
|                         |        | VI  | -     | -     | 0.88  | 0.40  | 0.88  | 1.76  | -     | -     | -     |
| Unvaccinated Controls   | 1241   | PCR | -     | 31.72 | 21.59 | 18.20 | 24.07 | 18.07 | 31.07 | 32.62 | 30.84 |
|                         |        | VI  | -     | -     | 3.45  | 2.80  | 2.99  | 3.05  | -     | -     | -     |
|                         | 1242   | PCR | -     | 30.43 | 20.45 | 24.68 | 24.30 | 25.10 | 30.23 | 30.18 | 31.82 |
|                         |        | VI  | -     | 1.54  | 3.74  | 2.55  | 2.60  | 2.12  | 1.00  | -     | -     |
|                         | 1243   | PCR | -     | -     | 20.89 | 24.76 | 17.72 | 19.71 | 26.93 | 27.44 | 31.70 |
|                         |        | VI  | -     | -     | 3.79  | 2.23  | 3.35  | 3.10  | 1.44  | -     | -     |

Supplementary Table 4. Results of virus isolation and titration (VI; log<sub>10</sub> PFU/ml) and viral RNA detected by real-time PCR (PCR; C<sub>p</sub> values) from mouth swabs of vaccinated and unvaccinated cattle in the full dose protection test with A<sub>22</sub>/IRQ/64 and A/MAY/97 vaccines (animal numbers in bold indicate cattle with clear or doubtful foot lesions).

| Groups                  | Animal   |      | 0 DPC | 1 DPC | 2 DPC | 3 DPC | 4 DPC | 5 DPC | 6 DPC | 7 DPC | 8 DPC |       |
|-------------------------|----------|------|-------|-------|-------|-------|-------|-------|-------|-------|-------|-------|
| A <sub>22</sub> /IRQ/64 | 1227     | PCR  | -     | 14.04 | 14.86 | 14.67 | 20.69 | 16.85 | 24.16 | -     | -     |       |
|                         |          | VI   | -     | 6.13  | 5.00  | 3.70  | 2.61  | 3.96  | 1.63  | -     | -     |       |
|                         | 1228     | PCR  | -     | 10.57 | 10.83 | 16.74 | 19.56 | 19.89 | 28.89 | 30.20 | 26.39 |       |
|                         |          | VI   | -     | 6.79  | 6.22  | 3.86  | 3.36  | 2.30  | -     | -     | -     |       |
|                         | 1229     | PCR  | -     | 9.34  | 16.56 | 18.27 | 15.90 | 16.01 | 18.16 | 23.04 | 27.44 |       |
|                         |          | VI   | -     | 7.44  | 3.44  | 3.54  | 4.48  | 3.55  | 2.00  | -     | -     |       |
|                         | 1230     | PCR  | -     | 31.84 | 10.50 | 15.13 | 23.72 | 21.02 | 20.53 | 27.46 | 27.96 |       |
|                         |          | VI   | -     | -     | 5.49  | 4.00  | 2.10  | 1.68  | -     | -     | -     |       |
|                         | 1231     | PCR  | -     | 21.82 | 15.61 | 17.66 | 17.06 | 16.12 | 18.76 | 25.83 | 29.09 |       |
|                         |          | VI   | -     | 5.23  | 5.22  | 4.40  | 4.50  | 4.13  | 4.23  | -     | -     |       |
|                         | 1232     | PCR  | -     | 13.52 | 8.15  | 23.08 | 14.23 | 11.87 | 22.56 | 30.86 | -     |       |
|                         |          | VI   | -     | 6.56  | 7.93  | 4.10  | 5.48  | 5.14  | 1.57  | -     | -     |       |
|                         | 1233     | PCR  | -     | 8.86  | 14.96 | 16.67 | 18.90 | 23.56 | 27.71 | 27.29 | 31.82 |       |
|                         |          | VI   | -     | 6.72  | 4.64  | 3.88  | 2.96  | 2.01  | -     | -     | -     |       |
|                         | A/MAY/97 | 1234 | PCR   | -     | 24.45 | 17.69 | 20.71 | 28.42 | 29.18 | 31.80 | 31.74 | -     |
|                         |          |      | VI    | -     | 2.78  | 4.44  | 4.10  | 2.06  | 1.51  | -     | -     | -     |
| 1235                    |          | PCR  | -     | 30.63 | 11.64 | 11.90 | 16.90 | 15.62 | 18.58 | 29.63 | 31.77 |       |
|                         |          | VI   | -     | 1.24  | 5.90  | 5.83  | 4.48  | 3.97  | 2.24  | -     | -     |       |
| 1236                    |          | PCR  | -     | 27.14 | 16.49 | 23.53 | 17.05 | 28.56 | 30.52 | 32.14 | -     |       |
|                         |          | VI   | -     | 2.64  | 4.47  | 1.30  | 4.90  | 0.40  | 0.70  | -     | -     |       |
| 1237                    |          | PCR  | -     | 25.81 | 9.77  | 17.79 | 13.00 | 17.98 | 19.53 | 24.67 | 31.73 |       |
|                         |          | VI   | -     | 2.68  | 6.60  | 4.35  | 6.06  | 3.07  | 2.28  | -     | -     |       |
| 1238                    |          | PCR  | -     | 25.68 | 17.51 | 27.59 | 30.86 | 29.96 | -     | -     | -     |       |
|                         |          | VI   | -     | 2.48  | 4.53  | 1.48  | 1.22  | 1.00  | -     | -     | -     |       |
| 1239                    |          | PCR  | -     | 20.92 | 10.87 | 17.66 | 20.79 | 22.72 | 27.62 | 29.56 | 30.68 |       |
|                         |          | VI   | -     | 3.25  | 6.65  | 4.18  | 2.00  | 2.57  | 1.78  | -     | -     |       |
| 1240                    |          | PCR  | -     | 11.46 | 8.62  | 19.92 | 20.02 | 15.16 | 22.44 | 27.63 | 31.83 |       |
|                         |          | VI   | -     | 6.47  | 7.53  | 3.13  | 3.54  | 4.66  | -     | -     | -     |       |
| Unvaccinated Controls   |          | 1241 | PCR   | -     | 30.52 | 15.83 | 19.61 | 19.01 | 18.58 | 22.47 | 21.49 | 22.60 |
|                         |          |      | VI    | -     | 2.71  | 4.53  | 3.35  | 2.80  | 3.04  | 2.67  | 2.08  | 1.51  |
|                         | 1242     | PCR  | -     | 23.47 | 12.41 | 15.96 | 20.21 | 14.03 | 25.30 | 24.70 | 21.66 |       |
|                         |          | VI   | -     | 2.89  | 5.04  | 2.92  | 3.40  | 4.61  | 2.12  | 1.54  | 0.88  |       |
|                         | 1243     | PCR  | -     | 26.80 | 12.59 | 17.33 | 18.08 | 18.09 | 18.71 | 18.93 | 20.64 |       |
|                         |          | VI   | -     | 2.60  | 4.68  | 2.66  | 3.43  | 3.51  | 3.60  | 1.40  | 0.88  |       |

Supplementary Table 5a. VNT titres against A/MAY/97 vaccine strain in vaccinated and unvaccinated cattle in the heterologous potency test (animal numbers in bold indicate cattle with foot lesions).

| Groups                   | Animal      | Days post challenge |      |      |      |      |      |      |      |      |      |      |      |
|--------------------------|-------------|---------------------|------|------|------|------|------|------|------|------|------|------|------|
|                          |             | -21                 | -14  | -7   | 0    | 1    | 2    | 3    | 4    | 5    | 6    | 7    | 8    |
| Full Dose<br>(2ml)       | 1566        | <0.3                | 1.20 | 1.65 | 2.10 | 2.10 | 2.25 | 2.40 | 2.25 | >2.4 | >2.4 | >2.4 | >2.4 |
|                          | 1567        | <0.3                | 1.05 | 2.25 | 2.25 | 2.40 | 2.40 | 2.40 | 2.40 | >2.4 | >2.4 | >2.4 | >2.4 |
|                          | 1568        | <0.3                | 1.05 | 1.50 | 2.40 | 2.40 | 2.40 | 2.40 | 2.25 | >2.4 | >2.4 | >2.4 | >2.4 |
|                          | 1569        | <0.3                | 1.50 | 1.80 | 2.10 | 2.40 | 2.40 | 2.40 | 2.40 | >2.4 | >2.4 | >2.4 | >2.4 |
|                          | 1570        | <0.3                | 0.90 | 1.95 | 2.25 | 2.40 | 2.40 | 2.40 | 2.40 | >2.4 | >2.4 | >2.4 | >2.4 |
| 1/3 Dose (0.66<br>ml)    | 1571        | <0.3                | 0.90 | 1.65 | 2.10 | 2.10 | 2.40 | 2.40 | 2.40 | >2.4 | >2.4 | >2.4 | >2.4 |
|                          | 1572        | <0.3                | 1.05 | 1.65 | 2.25 | 2.10 | 2.40 | 2.25 | 2.25 | >2.4 | >2.4 | >2.4 | >2.4 |
|                          | 1573        | <0.3                | 0.90 | 1.80 | 2.40 | 2.40 | 2.40 | 2.40 | 2.40 | >2.4 | >2.4 | >2.4 | >2.4 |
|                          | 1574        | <0.3                | 0.30 | 0.90 | 1.50 | 1.80 | 2.40 | 1.95 | 1.95 | >2.4 | >2.4 | >2.4 | >2.4 |
|                          | <b>1575</b> | <0.3                | 0.60 | 2.10 | 2.10 | 2.10 | 2.10 | 1.80 | 2.40 | >2.4 | >2.4 | >2.4 | >2.4 |
| 1/9 Dose<br>(0.22ml)     | <b>1576</b> | <0.3                | 0.75 | 1.20 | 1.65 | 1.65 | 1.65 | 1.50 | 1.80 | >2.4 | >2.4 | >2.4 | >2.4 |
|                          | 1577        | <0.3                | 1.05 | 1.50 | 1.65 | 1.50 | 2.25 | 1.65 | 1.95 | >2.4 | >2.4 | >2.4 | >2.4 |
|                          | 1578        | <0.3                | 0.45 | 0.75 | 1.20 | 1.80 | 1.95 | 1.80 | 1.80 | >2.4 | >2.4 | >2.4 | >2.4 |
|                          | <b>1579</b> | <0.3                | 0.30 | <0.3 | 1.05 | 1.50 | 1.50 | 1.20 | 1.80 | >2.4 | >2.4 | >2.4 | >2.4 |
|                          | <b>1580</b> | <0.3                | 0.30 | 0.75 | 1.20 | 1.35 | 1.35 | 1.05 | 1.65 | >2.4 | >2.4 | >2.4 | >2.4 |
| Unvaccinated<br>Controls | <b>1581</b> |                     |      | <0.3 | <0.3 | 0.30 | 1.05 | <0.3 | 0.90 | 1.65 | 2.10 | 2.10 |      |
|                          | <b>1582</b> |                     |      | <0.3 | 0.30 | 0.30 | 0.75 | <0.3 | 0.90 | 1.65 | 1.80 | 1.95 | 2.10 |
|                          | <b>1583</b> |                     |      | <0.3 | <0.3 | 0.30 | 1.35 | <0.3 | 1.05 | 1.35 | 1.95 | 2.10 | 2.25 |

Supplementary Table 5b. VNT titres against A/IRN/22/2015 in vaccinated and unvaccinated cattle in the heterologous potency test vaccines (animal numbers in bold indicate cattle with foot lesions).

| Groups                | Animal      | Days post challenge |      |      |      |      |      |      |      |      |      |      |      |
|-----------------------|-------------|---------------------|------|------|------|------|------|------|------|------|------|------|------|
|                       |             | -21                 | -14  | -7   | 0    | 1    | 2    | 3    | 4    | 5    | 6    | 7    | 8    |
| Full Dose (2ml)       | 1566        | <0.3                | 0.60 | 1.05 | 1.20 | 1.05 | 1.05 | 1.50 | 1.35 | 1.95 | 2.10 | >2.4 | >2.4 |
|                       | 1567        | <0.3                | 0.45 | 1.35 | 1.50 | 1.05 | 1.35 | 1.80 | 1.95 | >2.4 | >2.4 | >2.4 | >2.4 |
|                       | 1568        | <0.3                | 0.90 | 0.75 | 1.20 | 1.20 | 1.20 | 1.35 | 1.35 | >2.4 | >2.4 | >2.4 | >2.4 |
|                       | 1569        | <0.3                | 1.65 | 1.80 | 1.65 | 1.65 | 1.65 | 1.65 | 1.80 | 2.25 | 2.25 | >2.4 | >2.4 |
|                       | 1570        | <0.3                | 0.30 | 1.20 | 1.35 | 1.35 | 1.65 | 2.10 | 1.95 | >2.4 | >2.4 | >2.4 | >2.4 |
| 1/3 Dose (0.66 ml)    | 1571        | <0.3                | 0.30 | 0.90 | 1.35 | 1.20 | 1.35 | 1.50 | 1.50 | 2.25 | >2.4 | >2.4 | >2.4 |
|                       | 1572        | <0.3                | 1.20 | 0.90 | 1.05 | 1.05 | 1.20 | 1.20 | 1.80 | >2.4 | >2.4 | >2.4 | >2.4 |
|                       | 1573        | <0.3                | 0.45 | 1.80 | 1.65 | 1.50 | 1.95 | 1.65 | 2.25 | >2.4 | >2.4 | >2.4 | >2.4 |
|                       | 1574        | <0.3                | <0.3 | 0.45 | 0.75 | 0.75 | 0.90 | 0.90 | 1.65 | 2.25 | >2.4 | >2.4 | >2.4 |
|                       | <b>1575</b> | <0.3                | <0.3 | 0.60 | 0.60 | 0.75 | 1.05 | 0.75 | 1.50 | >2.4 | >2.4 | >2.4 | >2.4 |
| 1/9 Dose (0.22ml)     | <b>1576</b> | <0.3                | 0.30 | 1.05 | 0.90 | 0.60 | 0.90 | 0.75 | 0.90 | 1.50 | >2.4 | >2.4 | >2.4 |
|                       | 1577        | <0.3                | 0.60 | 1.05 | 1.20 | 1.05 | 1.05 | 1.35 | 1.35 | 1.50 | >2.4 | >2.4 | >2.4 |
|                       | 1578        | <0.3                | <0.3 | <0.3 | 0.75 | 1.05 | 1.20 | 1.20 | 1.05 | 1.80 | 2.25 | >2.4 | >2.4 |
|                       | <b>1579</b> | <0.3                | <0.3 | <0.3 | 0.30 | 0.90 | 1.35 | 0.75 | 1.35 | 1.95 | 2.25 | >2.4 | >2.4 |
|                       | <b>1580</b> | <0.3                | 0.30 | 0.45 | 0.30 | 0.45 | 0.90 | 0.30 | 0.90 | 1.80 | >2.4 | >2.4 | >2.4 |
| Unvaccinated Controls | <b>1581</b> |                     |      |      | <0.3 | 0.30 | 1.05 | 0.30 | 0.75 | 1.50 | 2.25 | >2.4 | >2.4 |
|                       | <b>1582</b> |                     |      |      | <0.3 | 0.30 | 0.90 | 0.30 | 1.35 | 1.80 | 2.25 | >2.4 | >2.4 |
|                       | <b>1583</b> |                     |      |      | <0.3 | 0.30 | 1.05 | 0.45 | 1.35 | 1.80 | >2.4 | >2.4 | >2.4 |



Supplementary Table 6. Results of virus isolation and titration (VI; log<sub>10</sub> PFU/ml) and viral RNA detected by real-time PCR (PCR; C<sub>p</sub> values) from serum of vaccinated and unvaccinated cattle in the heterologous potency test vaccines (animal numbers in bold indicate cattle with foot lesions).

| Group              | Animal                |             | 0 DPC | 1 DPC  | 2 DPC  | 3 DPC  | 4 DPC  | 5 DPC | 6 DPC | 7 DPC | 8 DPC |   |
|--------------------|-----------------------|-------------|-------|--------|--------|--------|--------|-------|-------|-------|-------|---|
| Full dose (2 ml)   | 1566                  | PCR         | -     | -      | -      | -      | 32.37  | -     | -     | -     | -     |   |
|                    |                       | VI          | -     | -      | -      | -      | -      | -     | -     | -     | -     |   |
|                    | 1567                  | PCR         | -     | -      | -      | -      | 32.24  | -     | -     | -     | -     |   |
|                    |                       | VI          | -     | -      | -      | -      | -      | -     | -     | -     | -     |   |
|                    | 1568                  | PCR         | -     | -      | -      | -      | -      | -     | -     | -     | -     |   |
|                    |                       | VI          | -     | -      | -      | -      | -      | -     | -     | -     | -     |   |
|                    | 1569                  | PCR         | -     | -      | -      | 31.92  | -      | -     | -     | -     | -     |   |
|                    |                       | VI          | -     | -      | -      | -      | -      | -     | -     | -     | -     |   |
|                    | 1570                  | PCR         | -     | -      | -      | 32.02  | 32.45  | -     | -     | -     | -     |   |
|                    |                       | VI          | -     | -      | -      | -      | -      | -     | -     | -     | -     |   |
|                    | 1/3 dose (0.66 ml)    | 1571        | PCR   | -      | -      | 30.29  | -      | -     | -     | -     | -     | - |
|                    |                       |             | VI    | -      | -      | -      | -      | -     | -     | -     | -     | - |
| 1572               |                       | PCR         | -     | -      | 29.87  | 32.03  | -      | -     | -     | -     | -     |   |
|                    |                       | VI          | -     | -      | -      | -      | -      | -     | -     | -     | -     |   |
| 1573               |                       | PCR         | -     | -      | -      | -      | -      | -     | -     | -     | -     |   |
|                    |                       | VI          | -     | -      | -      | -      | -      | -     | -     | -     | -     |   |
| 1574               |                       | PCR         | -     | -      | -      | 32.09  | -      | -     | -     | -     | -     |   |
|                    |                       | VI          | -     | -      | -      | -      | -      | -     | -     | -     | -     |   |
| <b>1575</b>        |                       | PCR         | -     | -      | -      | 30.83  | -      | -     | -     | -     | -     |   |
|                    |                       | VI          | -     | -      | -      | -      | -      | -     | -     | -     | -     |   |
| 1/9 dose (0.22 ml) |                       | <b>1576</b> | PCR   | -      | 31.56  | 29.53  | 28.68  | 31.73 | -     | -     | -     | - |
|                    |                       |             | VI    | -      | -      | -      | -      | -     | -     | -     | -     | - |
|                    | 1577                  | PCR         | -     | -      | -      | 32.55  | 31.94  | -     | -     | -     | -     |   |
|                    |                       | VI          | -     | -      | -      | -      | -      | -     | -     | -     | -     |   |
|                    | 1578                  | PCR         | -     | -      | -      | -      | -      | -     | -     | -     | -     |   |
|                    |                       | VI          | -     | -      | -      | -      | -      | -     | -     | -     | -     |   |
|                    | <b>1579</b>           | PCR         | -     | 28.66  | 30.81  | 29.81  | 29.72  | -     | -     | -     | -     |   |
|                    |                       | VI          | -     | -      | -      | -      | -      | -     | -     | -     | -     |   |
|                    | <b>1580</b>           | PCR         | -     | 30.81  | 30.40  | 26.93  | 30.96  | -     | -     | -     | -     |   |
|                    |                       | VI          | -     | -      | -      | -      | -      | -     | -     | -     | -     |   |
|                    | Unvaccinated Controls | <b>1581</b> | PCR   | -      | 17.1   | 14.79  | 14.56  | 25.5  | -     | -     | -     | † |
|                    |                       |             | VI    | -      | >10.00 | >10.00 | >10.00 | -     | -     | -     | -     | - |
| <b>1582</b>        |                       | PCR         | -     | 19.68  | 17.70  | 19.47  | 29.00  | 31.94 | -     | -     | -     |   |
|                    |                       | VI          | -     | >10.00 | >10.00 | >10.00 | -      | -     | -     | -     | -     |   |
| <b>1583</b>        |                       | PCR         | -     | 17.86  | 19.46  | 18.80  | 29.18  | -     | -     | -     | -     |   |
|                    |                       | VI          | -     | >10.00 | >10.00 | >10.00 | -      | -     | -     | -     | -     |   |

Supplementary Table 7. Results of virus isolation and titration (VI; log<sub>10</sub> PFU/ml) and viral RNA detected by real-time PCR (PCR; Cp values) from nose swabs of vaccinated and unvaccinated cattle in the heterologous potency test vaccines (animal numbers in bold indicate cattle with foot lesions).

| Group              | Animal                |      | 0 DPC | 1 DPC | 2 DPC | 3 DPC | 4 DPC | 5 DPC | 6 DPC | 7 DPC | 8 DPC |       |
|--------------------|-----------------------|------|-------|-------|-------|-------|-------|-------|-------|-------|-------|-------|
| Full dose (2 ml)   | 1566                  | PCR  | -     | 9.45  | 12.75 | 14.53 | 15.68 | 19.22 | 21.76 | 31.10 | 27.85 |       |
|                    |                       | VI   | -     | 7.68  | 6.80  | 6.00  | 4.70  | 3.13  | 3.24  | -     | -     |       |
|                    | 1567                  | PCR  | -     | 11.60 | 13.64 | 21.81 | 20.45 | 23.24 | 25.50 | 32.32 | -     |       |
|                    |                       | VI   | -     | 7.44  | 5.83  | 2.40  | 3.35  | 3.00  | 0.40  | 0.40  | -     |       |
|                    | 1568                  | PCR  | -     | 14.75 | 14.85 | 20.42 | 20.99 | 31.74 | 32.09 | 32.32 | -     |       |
|                    |                       | VI   | -     | 5.24  | 5.24  | 3.10  | 3.13  | -     | -     | -     | -     |       |
|                    | 1569                  | PCR  | -     | 8.13  | 16.76 | 17.59 | 16.90 | 23.59 | 27.09 | 30.00 | 31.43 |       |
|                    |                       | VI   | -     | 8.28  | 4.01  | 4.96  | 3.74  | 3.13  | 1.74  | -     | -     |       |
|                    | 1570                  | PCR  | -     | 8.01  | 17.04 | 16.89 | 19.80 | 22.64 | 28.20 | 32.60 | -     |       |
|                    |                       | VI   | -     | 7.04  | 3.94  | 6.64  | 7.57  | 2.51  | -     | -     | -     |       |
|                    | 1/3 dose (0.66 ml)    | 1571 | PCR   | -     | 6.00  | 13.46 | 18.44 | 11.74 | 22.53 | 21.21 | 25.88 | 31.25 |
|                    |                       |      | VI    | -     | 8.00  | 5.30  | 3.11  | 7.39  | -     | 1.54  | -     | -     |
| 1572               |                       | PCR  | -     | 8.01  | 16.93 | 14.06 | 19.95 | 23.39 | 24.52 | 29.70 | 31.23 |       |
|                    |                       | VI   | -     | 7.93  | 3.92  | 5.09  | 4.24  | 2.17  | -     | -     | -     |       |
| 1573               |                       | PCR  | -     | 30.00 | 16.60 | 17.32 | 20.74 | 29.25 | 32.47 | -     | -     |       |
|                    |                       | VI   | -     | 1.10  | 5.00  | 3.26  | 2.70  | 0.40  | -     | -     | -     |       |
| 1574               |                       | PCR  | -     | 7.56  | 13.90 | 18.06 | 19.87 | 23.83 | 31.73 | -     | -     |       |
|                    |                       | VI   | -     | 7.08  | 4.83  | 3.68  | 4.13  | 2.40  | -     | -     | -     |       |
| 1575               |                       | PCR  | -     | 8.86  | 9.58  | 9.56  | 21.80 | 22.84 | 26.47 | 30.45 | 31.56 |       |
|                    |                       | VI   | -     | 7.07  | 6.35  | 7.07  | 5.18  | 2.10  | 0.88  | 0.40  | -     |       |
| 1/9 dose (0.22 ml) |                       | 1576 | PCR   | -     | 18.54 | 9.92  | 17.48 | 17.55 | 25.16 | 31.07 | 32.71 | 33.84 |
|                    |                       |      | VI    | -     | 4.05  | 6.16  | 5.10  | 5.95  | 3.10  | 0.70  | -     | -     |
|                    | 1577                  | PCR  | -     | 7.47  | 10.27 | 17.98 | 15.08 | 20.07 | 21.11 | 24.70 | 28.91 |       |
|                    |                       | VI   | -     | 7.51  | 6.89  | 5.10  | 6.10  | 2.70  | 2.70  | 1.00  | -     |       |
|                    | 1578                  | PCR  | -     | 11.76 | 13.67 | 19.57 | 20.75 | 21.79 | 25.00 | 21.24 | 32.55 |       |
|                    |                       | VI   | -     | 6.38  | 5.31  | 3.11  | 2.88  | 3.00  | -     | -     | -     |       |
|                    | 1579                  | PCR  | -     | 9.94  | 11.56 | 18.72 | 19.73 | 25.70 | 31.75 | 32.55 | 34.12 |       |
|                    |                       | VI   | -     | 6.95  | 6.04  | 3.44  | 3.26  | 1.86  | -     | -     | -     |       |
|                    | 1580                  | PCR  | -     | 6.93  | 16.96 | 19.23 | 18.91 | 26.16 | 30.87 | 32.26 | 33.78 |       |
|                    |                       | VI   | -     | 7.44  | 3.89  | 3.48  | 3.92  | 2.02  | 0.70  | -     | -     |       |
|                    | Unvaccinated Controls | 1581 | PCR   | -     | 9.56  | 12.85 | 16.56 | 15.21 | 19.99 | 24.55 | 29.68 | +     |
|                    |                       |      | VI    | -     | 6.72  | 4.32  | 4.94  | 5.24  | 3.98  | 2.55  | 1.63  |       |
| 1582               |                       | PCR  | -     | 8.09  | 13.87 | 17.64 | 19.94 | 22.62 | 25.84 | 28.75 | 27.24 |       |
|                    |                       | VI   | -     | 7.13  | 3.89  | 3.77  | 3.76  | 3.00  | 1.54  | -     | -     |       |
| 1583               |                       | PCR  | -     | 20.81 | 14.25 | 17.72 | 18.03 | 23.80 | 29.50 | 27.02 | 27.71 |       |
|                    |                       | VI   | -     | 3.68  | 4.88  | 3.88  | 3.90  | 2.15  | 0.70  | 0.40  | -     |       |

Supplementary Table 8. Results of virus isolation and titration (VI; log<sub>10</sub> PFU/ml) and viral RNA detected by real-time PCR (PCR; Cp values) from mouth swabs of vaccinated and unvaccinated cattle in the heterologous potency test vaccines (animal numbers in bold indicate cattle with foot lesions).

| Group              | Animal                |      | 0 DPC | 1 DPC | 2 DPC | 3 DPC | 4 DPC | 5 DPC | 6 DPC | 7 DPC | 8 DPC |       |
|--------------------|-----------------------|------|-------|-------|-------|-------|-------|-------|-------|-------|-------|-------|
| Full dose (2 ml)   | 1566                  | PCR  | -     | 25.61 | 30.58 | 30.83 | 29.90 | 30.46 | 31.89 | -     | -     |       |
|                    |                       | VI   | -     | 2.69  | 1.51  | 1.81  | 0.88  | 0.40  | -     | -     | -     |       |
|                    | 1567                  | PCR  | -     | 31.18 | 29.65 | 30.59 | 31.72 | 32.02 | 32.39 | -     | 33.76 |       |
|                    |                       | VI   | -     | 0.40  | 1.10  | 0.40  | -     | -     | -     | -     | -     |       |
|                    | 1568                  | PCR  | -     | 29.32 | 29.91 | 30.46 | 29.65 | 29.81 | 31.70 | -     | -     |       |
|                    |                       | VI   | -     | 1.00  | 1.86  | -     | -     | 0.88  | -     | -     | -     |       |
|                    | 1569                  | PCR  | -     | -     | -     | 31.39 | 31.74 | 32.08 | -     | -     | -     |       |
|                    |                       | VI   | -     | -     | -     | -     | 0.70  | -     | -     | -     | -     |       |
|                    | 1570                  | PCR  | -     | 29.00 | -     | 31.17 | 32.07 | 31.80 | -     | -     | -     |       |
|                    |                       | VI   | -     | 0.88  | -     | -     | -     | -     | -     | -     | -     |       |
|                    | 1/3 dose (0.66 ml)    | 1571 | PCR   | -     | 30.93 | 31.21 | 31.23 | 30.52 | 31.63 | 32.61 | 32.45 | -     |
|                    |                       |      | VI    | -     | 0.88  | -     | -     | -     | -     | -     | 0.40  | -     |
| 1572               |                       | PCR  | -     | 30.94 | 31.38 | 24.87 | 29.22 | 30.60 | 31.74 | 32.59 | -     |       |
|                    |                       | VI   | -     | -     | -     | 2.56  | 1.00  | -     | -     | -     | -     |       |
| 1573               |                       | PCR  | -     | -     | 31.22 | 31.75 | 30.20 | -     | -     | -     | -     |       |
|                    |                       | VI   | -     | -     | -     | -     | -     | -     | -     | -     | -     |       |
| 1574               |                       | PCR  | -     | 24.68 | 30.80 | 29.84 | 31.45 | 31.59 | -     | -     | -     |       |
|                    |                       | VI   | -     | 3.30  | -     | 0.70  | -     | -     | -     | -     | -     |       |
| 1575               |                       | PCR  | -     | 30.04 | 31.11 | 31.29 | 30.99 | 31.85 | 31.87 | 32.72 | 33.46 |       |
|                    |                       | VI   | -     | 1.00  | 1.00  | 0.40  | 0.40  | -     | -     | -     | -     |       |
| 1/9 dose (0.22 ml) |                       | 1576 | PCR   | -     | 30.41 | 31.22 | 31.66 | 31.42 | -     | 31.94 | -     | 32.04 |
|                    |                       |      | VI    | -     | 0.88  | -     | -     | 0.70  | -     | -     | -     | -     |
|                    | 1577                  | PCR  | -     | -     | -     | 31.45 | 31.63 | 30.78 | -     | 32.58 | -     |       |
|                    |                       | VI   | -     | 0.40  | -     | -     | -     | -     | -     | -     | -     |       |
|                    | 1578                  | PCR  | -     | -     | 23.70 | 29.89 | 32.00 | 31.48 | -     | -     | -     |       |
|                    |                       | VI   | -     | -     | 1.93  | 1.57  | -     | 0.40  | -     | -     | -     |       |
|                    | 1579                  | PCR  | -     | 30.92 | 24.19 | 29.26 | 30.01 | 29.27 | 30.88 | 32.73 | -     |       |
|                    |                       | VI   | -     | 2.10  | 3.20  | 1.40  | 1.70  | 0.40  | -     | -     | -     |       |
|                    | 1580                  | PCR  | -     | -     | 24.45 | 31.84 | 29.22 | 31.74 | 32.40 | -     | -     |       |
|                    |                       | VI   | -     | -     | 3.61  | 0.70  | 2.06  | -     | -     | -     | -     |       |
|                    | Unvaccinated Controls | 1581 | PCR   | -     | 27.64 | 19.44 | 19.36 | 18.19 | 27.58 | 28.17 | 30.50 | †     |
|                    |                       |      | VI    | -     | 2.79  | 3.69  | 4.72  | 4.65  | 1.44  | 0.40  | -     | -     |
| 1582               |                       | PCR  | -     | 31.06 | 21.55 | 23.46 | 21.63 | 26.62 | 25.99 | 29.58 | 29.04 |       |
|                    |                       | VI   | -     | 1.35  | 3.49  | 3.02  | 3.91  | 2.10  | 1.00  | -     | -     |       |
| 1583               | PCR                   | -    | 29.72 | 26.13 | 26.44 | 21.20 | 28.00 | 31.84 | -     | -     |       |       |

Supplementary Table 9a. Percentage inhibition in the Priocheck NS ELISA in the full dose protection test. Positive values above 50% inhibition are indicated in yellow vaccines (animal numbers in bold indicate cattle with clear or doubtful foot lesions).

| Groups                          | Animal                | 0 DPC       | 1 DPC | 2 DPC | 3 DPC | 4 DPC | 5 DPC | 6 DPC | 7 DPC | 8 DPC |    |
|---------------------------------|-----------------------|-------------|-------|-------|-------|-------|-------|-------|-------|-------|----|
| Vaccine A <sub>22</sub> /IRQ/64 | 1227                  | 16          | 28    | 27    | 31    | 31    | 39    | 65    | 75    | 83    |    |
|                                 | <b>1228</b>           | 37          | 38    | 39    | 35    | 37    | 40    | 60    | 71    | 82    |    |
|                                 | <b>1229</b>           | 30          | 32    | 33    | 32    | 38    | 40    | 65    | 87    | 90    |    |
|                                 | <b>1230</b>           | 35          | 34    | 34    | 37    | 37    | 27    | 47    | 76    | 91    |    |
|                                 | <b>1231</b>           | 28          | 32    | 28    | 33    | 22    | 26    | 62    | 86    | 91    |    |
|                                 | 1232                  | 30          | 32    | 31    | 21    | 29    | 33    | 61    | 84    | 86    |    |
|                                 | <b>1233</b>           | 32          | 37    | 15    | 34    | 35    | 39    | 57    | 81    | 90    |    |
|                                 | <b>1234</b>           | 24          | 12    | 20    | 19    | 22    | 28    | 44    | 60    | 68    |    |
|                                 | 1235                  | 14          | 21    | 20    | 20    | 24    | 28    | 46    | 60    | 65    |    |
|                                 | 1236                  | 26          | 31    | 27    | 28    | 30    | 32    | 45    | 70    | 84    |    |
| Vaccine A/MAY/97                | <b>1237</b>           | 12          | 16    | 13    | 16    | 20    | 19    | 41    | 81    | 91    |    |
|                                 | 1238                  | 27          | 25    | 28    | 28    | 26    | 18    | 32    | 45    | 55    |    |
|                                 | 1239                  | 36          | 31    | 28    | 32    | 24    | 45    | 84    | 93    | 93    |    |
|                                 | 1240                  | 19          | 16    | 16    | 6     | 18    | 35    | 63    | 74    | 78    |    |
|                                 | Unvaccinated Controls | <b>1241</b> | -2    | 3     | -6    | 7     | 16    | 26    | 42    | 64    | 75 |
|                                 |                       | <b>1242</b> | 22    | 8     | 19    | 26    | 25    | 29    | 37    | 68    | 89 |
|                                 |                       | <b>1243</b> | 18    | 26    | 23    | 27    | 28    | 40    | 60    | 87    | 93 |

Supplementary Table 9b. Percentage inhibition in the Priocheck NS ELISA in the heterologous protection test vaccines (animal numbers in bold indicate cattle with foot lesions).

| Groups                | Animal | 0 DPC | 1 DPC | 2 DPC | 3 DPC | 4 DPC | 5 DPC | 6 DPC | 7 DPC | 8 DPC |
|-----------------------|--------|-------|-------|-------|-------|-------|-------|-------|-------|-------|
| Full Dose (2ml)       | 1566   | 21    | 19    | 16    | 19    | 24    | 30    | 79    | 92    | 93    |
|                       | 1567   | 32    | 28    | 27    | 28    | 29    | 32    | 59    | 78    | 85    |
|                       | 1568   | 15    | 17    | 14    | 15    | 18    | 13    | 32    | 55    | 70    |
|                       | 1569   | 37    | 40    | 42    | 40    | 41    | 35    | 44    | 64    | 80    |
|                       | 1570   | 41    | 40    | 41    | 42    | 43    | 61    | 81    | 90    | 93    |
| 1/3 Dose (0.66 ml)    | 1571   | 27    | 27    | 25    | 32    | 28    | 32    | 59    | 76    | 80    |
|                       | 1572   | 52    | 41    | 43    | 41    | 36    | 38    | 73    | 91    | 78    |
|                       | 1573   | 11    | 6     | 9     | 11    | 11    | 15    | 50    | 74    | 77    |
|                       | 1574   | 34    | 33    | 28    | 32    | 26    | 30    | 41    | 54    | 83    |
|                       | 1575   | 27    | 23    | 20    | 24    | 26    | 30    | 71    | 87    | 92    |
| 1/9 Dose (0.22ml)     | 1576   | 30    | 27    | 24    | 26    | 27    | 36    | 59    | 86    | 92    |
|                       | 1577   | 24    | 23    | 21    | 27    | 26    | 32    | 55    | 85    | 90    |
|                       | 1578   | 35    | 40    | 39    | 43    | 43    | 47    | 52    | 70    | 87    |
|                       | 1579   | 44    | 46    | 43    | 49    | 42    | 52    | 67    | 84    | 91    |
|                       | 1580   | 23    | 21    | 19    | 29    | 29    | 39    | 54    | 73    | 84    |
| Unvaccinated Controls | 1581   | 24    | 24    | 19    | 20    | 22    | 31    | 51    | 77    | NA    |
|                       | 1582   | 31    | 26    | 27    | 34    | 32    | 41    | 63    | 84    | 90    |
|                       | 1583   | 29    | 23    | 20    | 28    | 22    | 34    | 44    | 77    | 89    |
